# Supplementary material for: Validation of Administrative Big Database for Colorectal Cancer Searched by International Classification of Disease 10th Codes in Korean: A Retrospective Big-cohort Study
Source: PubMed Central journal article supplement — J Cancer Prev. 2018 Dec 30;23(4):183–90. doi: 10.15430/JCP.2018.23.4.183 (PMC6330990; doi:10.15430/jcp.2018.23.4.183), 2018-12-30
Supplement: jcp-23-183_suppl.pdf [file jcp-23-183_suppl.pdf]

**Supplementary 1.** ICD 10th code of colorectal cancer

| ICD code | Diagnosis                                                                                                                                                                                                       |
|----------|-----------------------------------------------------------------------------------------------------------------------------------------------------------------------------------------------------------------|
| C180     | Cecal cancer<br>Malignant neoplasm of cecum<br>Malignant neoplasm of ileocecal valve                                                                                                                            |
| C181     | Appendix cancer<br>Appendiceal cancer<br>Appendiceal adenocarcinoma<br>Appendiceal carcinoid, malignant<br>Other malignant neoplasm of appendix<br>Malignant neoplasm of appendix<br>Adenocarcinoma of appendix |
| C182     | Ascending colon cancer<br>Colon cancer, ascending<br>Malignant neoplasm of colon, ascending                                                                                                                     |
| C183     | Hepatic flexure cancer<br>Colon cancer, hepatic flexure<br>Malignant neoplasm of colon, hepatic flexure                                                                                                         |
| C184     | Transverse colon cancer<br>Colon cancer, transverse<br>Malignant neoplasm of colon, transverse                                                                                                                  |
| C185     | Colon cancer, splenic flexure<br>Splenic flexure cancer                                                                                                                                                         |
| C186     | Descending colon cancer<br>Colon cancer, descending<br>Primary malignant neoplasm of descending colon<br>Malignant neoplasm of colon, descending                                                                |
| C187     | Sigmoid colon cancer<br>Colon cancer, sigmoid<br>Malignant neoplasm of sigmoid colon<br>Adenocarcinoma of colon, sigmoid                                                                                        |
| C19      | Rectosigmoid colon cancer<br>Colon cancer, rectosigmoid<br>Adenocarcinoma of sigmoid colon<br>Malignant neoplasm of rectosigmoid junction                                                                       |
| C20      | Rectal cancer<br>Adenocarcinoma of rectum<br>Malignant tumor of rectum<br>Malignant neoplasm of rectum                                                                                                          |
| C210     | Anal cancer<br>Anal Cancer, other type<br>Squamous cell carcinoma of anus                                                                                                                                       |
| C211     | Anal canal cancer                                                                                                                                                                                               |
| C218     | Malignant neoplasm of rectum, anus and anal canal, overlapping lesion                                                                                                                                           |

ICD, International Classification of Disease.

**Supplementary 2.** ICD 10th code of inflammatory bowel disease and tuberculosis colitis

| ICD code | diagnosis                                                     |
|----------|---------------------------------------------------------------|
| K519     | Ulcerative colitis                                            |
| K518     | Other ulcerative colitis                                      |
| K515     | Proctocolitis                                                 |
| K515     | Left sided ulcerative colitis                                 |
| K514     | Inflammatory polyp                                            |
| K513     | Ulcerative rectosigmoiditis                                   |
| K513     | Ulcerative colitis with left colitis                          |
| K513     | Ulcerative proctocolitis                                      |
| K512     | Ulcerative proctitis                                          |
| K512     | Ulcerative colitis with proctitis                             |
| K510     | Ulcerative colitis with pancolitis                            |
| K510     | Ulcerative pancolitis                                         |
| K510     | Ulcerative ileocolitis                                        |
| K509     | Crohn's disease                                               |
| K509     | Crohn's disease unspecified                                   |
| K509     | Crohn's disease moderate                                      |
| K509     | Crohn's disease mild                                          |
| K509     | Crohn's disease severe                                        |
| K508     | Crohn's disease of both small and large intestine             |
| K508     | Crohn's disease with intestinal obstruction                   |
| K508     | Crohn's disease with intestinal obstruction unspecified       |
| K508     | Crohn's disease with intestinal obstruction moderate          |
| K508     | Crohn's disease with enteroenteric fistula                    |
| K508     | Crohn's disease with enterovesical fistula                    |
| K508     | Crohn's disease with enterovesical fistula unspecified        |
| K508     | Crohn's disease with enterocutaneous fistula                  |
| K508     | Crohn's disease with enterocutaneous fistula severe           |
| K508     | Crohn's disease with enterocutaneous fistula unspecified      |
| K508     | Crohn's disease with enterocutaneous fistula moderate         |
| K508     | Crohn's disease without fistula or obstruction                |
| K508     | Crohn's disease with intestinal obstruction severe            |
| K508     | Crohn's disease of both small and large intestine moderate    |
| K508     | Crohn's disease of both small and large intestine unspecified |
| K508     | Crohn's disease with intestinal obstruction mild              |
| K508     | Crohn's disease with enterocutaneous fistula mild             |
| K501     | Crohn's disease of large intestine                            |
| K501     | Crohn's disease of large intestine mild                       |
| K501     | Crohn's disease of large intestine severe                     |
| A1831    | Tuberculous colitis                                           |
| A1831    | Tuberculosis enteritis                                        |
| A1831    | Gastrointestinal tuberculosis                                 |
| A1831    | Intestinal tuberculosis                                       |
| A1831    | Tuberculous enteritis                                         |

ICD, International Classification of Disease.

**Supplementary 3.** Hospital procedure orders of pathologic examination

---

Registered pathologic order

---

Endoscopic biopsy (colonoscopy) 1~3 pieces of tissue  
Endoscopic biopsy (colonoscopy) 10~12 pieces of tissue  
Endoscopic biopsy (colonoscopy) 4~6 pieces of tissue  
Endoscopic biopsy (colonoscopy) 7~9 pieces of tissue  
Endoscopic biopsy (colonoscopy) 10~12 pieces of tissue  
Endoscopic polypectomy (colonoscopy)  $\leq 6$  pieces of tissue  
Endoscopic polypectomy (colonoscopy)  $\geq 7$  pieces of tissue  
Histopathologic mapping (endoscopic mucosal resection), (colonoscopy)  
Frozen section, 1~2 pieces of tissue  
Frozen section, 3~6 pieces of tissue  
Frozen section, 7~10 pieces of tissue  
Surgery of malignant tumor /  $\leq 20$  slides  
Surgery of malignant tumor /  $\geq 20$  slides  
Reading slides from other hospitals (surgery of malignant tumor)  
Reading slides from other hospitals (endoscopic biopsy)

---
